# Supplementary material for: miRNA-518a-3p inhibits hepatocarcinogenesis by suppressing ZNF281
Source: Research Square preprint supplement (doi:10.21203/rs.3.rs-1027296/v1), 2022-03-10
Supplement: Supplementary file 1 [file 6fb6bbfc793aa508d308148e.docx]

| Gene Name | Forward: Sequence 5’ to 3’ | Reverse: Sequence 5’ to 3’ |
| --- | --- | --- |
| miR-518a-3p | ACAGGCCGGGACAAGTGCAATA | GCTGTCAACGATACGCTACGTAACG |
| ZNF281 | GAGGACACATAGTGGAGAAAAGCC | TGAGACAACACAGCCAGATTACCC |
| U6 | TGCGGGTGCTCGCTTCGCAGC | CCAGTGCAGGGTCCGAGGT |
| GAPDH | ACACCCACTCCTCCACCTTT | TTACTCCTTGGAGGCCATGT |

Table S1. The list of primer in this study.
